# Supplementary material for: Evidence-Based Treatment for Melasma: Expert Opinion and a Review
Source: PubMed Central journal article supplement — Dermatol Ther (Heidelb). 2014 Oct 1;4(2):165–86. doi: 10.1007/s13555-014-0064-z (PMC4257945; doi:10.1007/s13555-014-0064-z), 2014-10-01
Supplement: 13555_2014_64_MOESM1_ESM.pdf [file 13555_2014_64_MOESM1_ESM.pdf]

- Recent studies have revealed negative effects or poor evidence of certain modalities for treating melasma in Indian patients, while new safe and effective treatment modalities are emerging.
- The Indian dermatologist's panel has proposed an algorithm to treat Indian patients with minimum adverse events and best efficacy after careful analysis of the quality and level of evidence of clinical studies on available treatment modalities.
- Topical use of triple combination of hydroquinone, tretinoin, and fluorinated steroid, as well as superficial to medium chemical peels are recommended.
- Laser therapy should be used sparingly if other alternatives fail to have an effect.

This summary slide represents the opinions of the authors. The authors acknowledge the help provided by Medical writer Ms Madhavi Muranjan for manuscript writing and Knowledge Isotopes Ltd. for editing and submission. Wockhardt Pvt. Ltd. funded the medical writing assistance and article processing charges for this article. For a full list of acknowledgments and conflicts of interest for all authors of this article, please see the full text online. Copyright © The Author(s) 2014. Creative Commons Attribution Noncommercial License (CC BY-NC).
